# Supplementary material
Source: Springer Nature journal article supplement (https://www.springermedizin.de/resource/supplementary/12885_2013_4204_MOESM11_ESM.pdf/9465756)

A

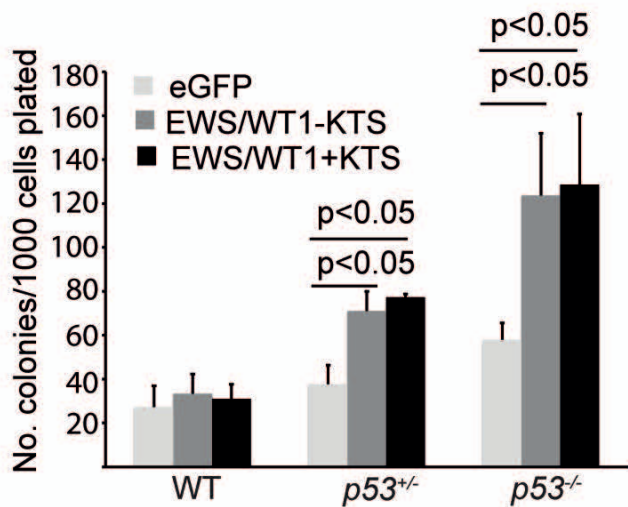

B

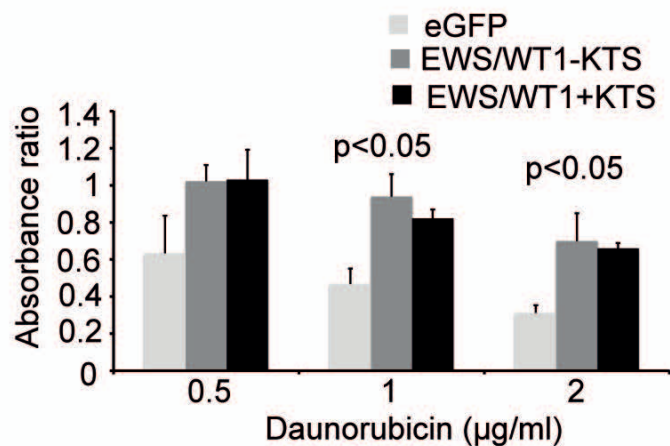

C

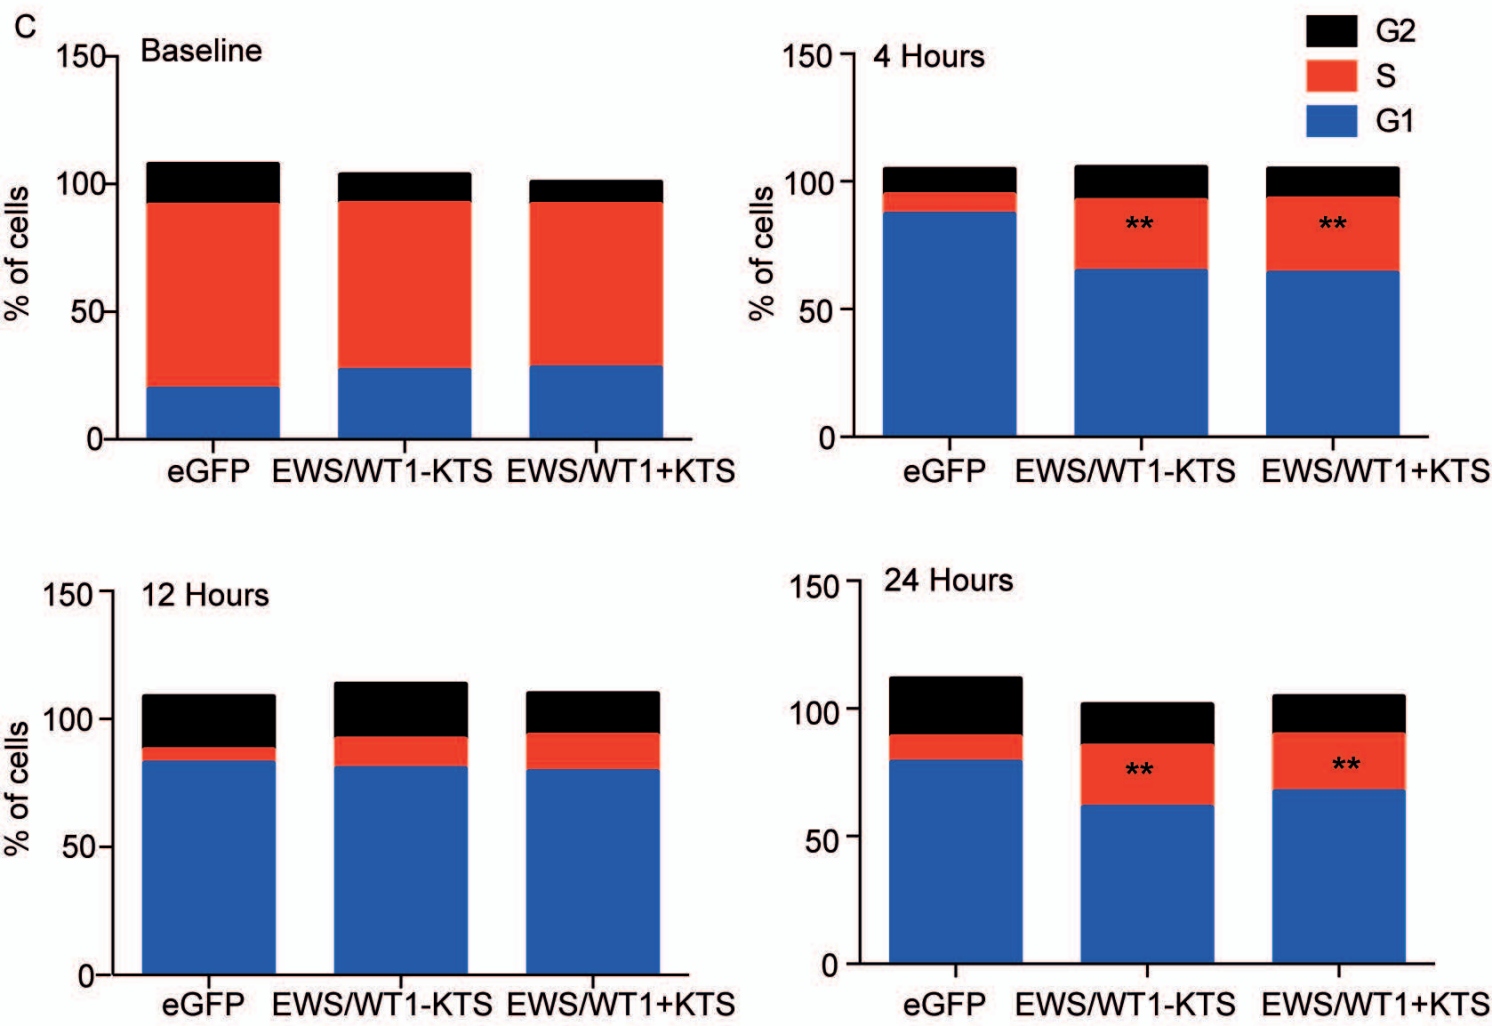

Supplement: MOESM11 [file 9465756]
